# Supplementary material for: CDR1 Composition Can Affect Nanobody Recombinant Expression Yields
Source: MDPI journal article supplement (doi:10.3390/biom11091362), 2021-09-14
Supplement: s1 [file s1]

## Supplementary Material

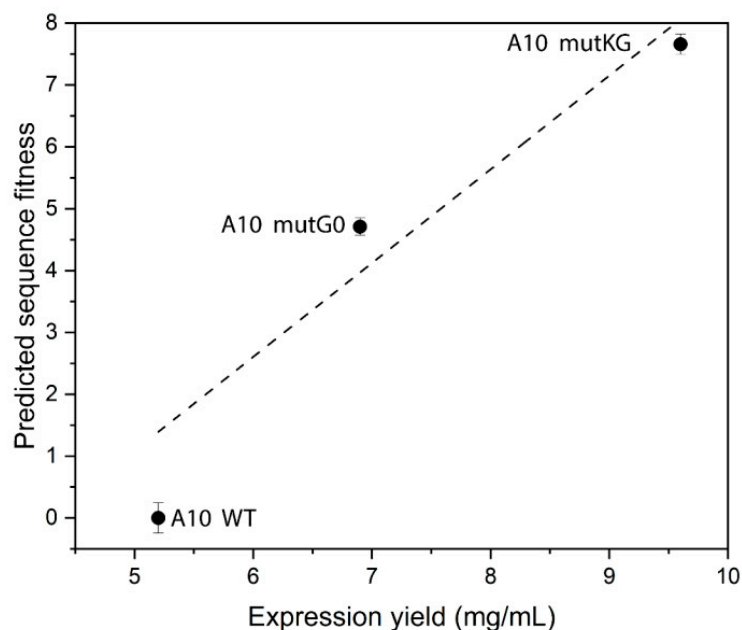

**Figure S1.** Linear regression of A10 variants expression yields and their predicted sequence fitness (expressed as log odds relative to A10 wt set as 0). Sequence fitness values were calculated on primary sequence with SeqDesign (<https://github.com/debbiemarkslab/SeqDesign>) trained on the same dataset as that used in <https://doi.org/10.1038/s41467-021-22732-w>.

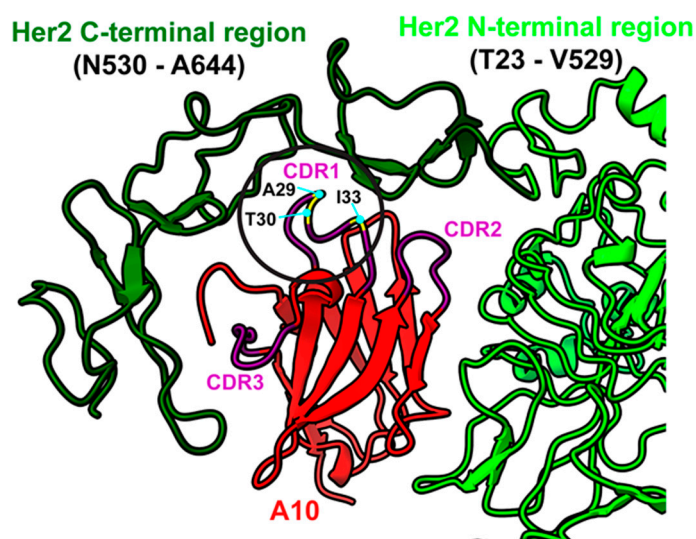

**Figure S2.** A10 wt/Her2 complex. The A10 wt/Her2 complex, represented in cartoon style, used as the starting structure in this study to predict the effect of glycine insertions on CDR1. This model was obtained after experiment-based docking and MD refinement [15]. CDR1 is highlighted by a black circle, and the residues predicted to determine the affinity with Her2 are depicted in yellow and labelled. The numbering of Her2 residues follows the sequence deposited in Uniprot (ID P04626).

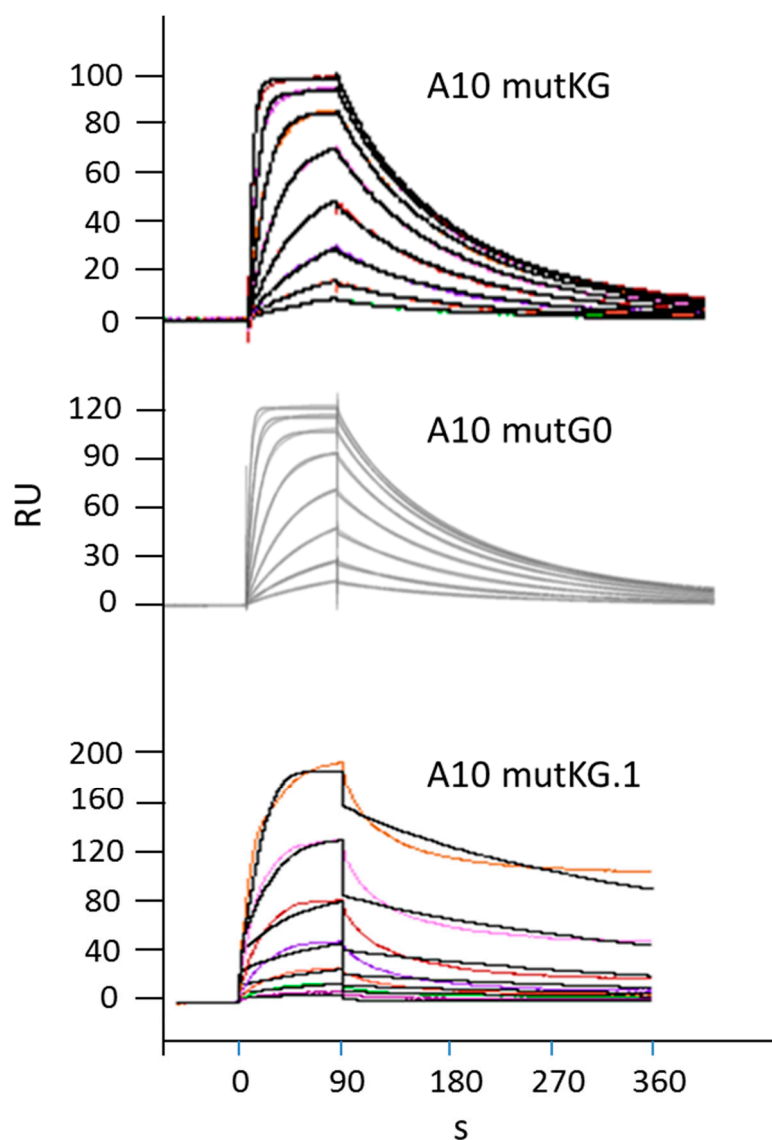

**Figure S3.** SPR analysis. The curves corresponding to the binding kinetics of the A10 mutants KG, G0 and KG.1 are reported

**Table S1.** SeqDesign assessment of CDR1 mutant fitness.

| Insertion Mutants                        | Logarithmic Differences of Relative Probability |
|------------------------------------------|-------------------------------------------------|
| AgTSN <b>I</b> SN (mutKG)                | $7.66 \pm 0.16$                                 |
| ATgTSN <b>I</b> SN                       | $5.88 \pm 0.14$                                 |
| AT <b>S</b> gTSN <b>I</b> SN (mutG0)     | $4.71 \pm 0.14$                                 |
| AT <b>S</b> NgTSN <b>I</b> SN            | $5.76 \pm 0.13$                                 |
| AT <b>S</b> NIgTSN <b>I</b> SN           | $5.59 \pm 0.12$                                 |
| AT <b>S</b> NI <b>S</b> gTSN <b>I</b> SN | $.98 \pm 0.13$                                  |

The effect of the insertion of a single glycine at different positions of the A10wt CDR1 (ATSNISN) was analyzed. Values are logarithmic differences of relative probability, higher they are and better are the fitness chances of the variant

**Table S2.** List of non-covalent Her2/A10 variants interactions.

| Her2 Residue | Region                 | A10 Residue  | Region                 | Interaction Type | % Simulation Frames |       |       |
|--------------|------------------------|--------------|------------------------|------------------|---------------------|-------|-------|
|              |                        |              |                        |                  | WT                  | mutKG | mutG0 |
| Y554         | Sidechain              | A29          | Backbone and sidechain | Hydrophobic      | 85                  | 30    | -     |
| Y554         | Backbone and sidechain | I33 (or I34) | Sidechain              | Hydrophobic      | 82                  | 56    | 62    |
| C563-C576    | Sidechain              | A29          | Backbone and sidechain | Van der Waals    | 81                  | 64    | 81    |
| N555         | Sidechain              | I33 (or I34) | Sidechain              | Van der Waals    | 80                  | 87    | 77    |
| L561         | Sidechain              | I33 (or I34) | Sidechain              | Hydrophobic      | 64                  | 74    | 79    |
| P594         | Sidechain              | T30 (or T31) | Sidechain              | Van der Waals    | 52                  | 35    | -     |
| L561         | Sidechain              | A29          | Backbone and Sidechain | Hydrophobic      | 51                  | 66    | 66    |
| Y554         | Sidechain              | T30 or (T31) | Backbone and Sidechain | Hydrogen bond    | 42                  | -     | 31    |
| F595         | Sidechain              | T30 (or T31) | Sidechain              | Hydrophobic      | 21                  | 87    | 64    |
| P594         | Sidechain              | T30 (or T31) | Sidechain              | Hydrogen bond    | 29                  | -     | 30    |
| Y554         | Sidechain              | G30          | Backbone               | Van der Waals    | -                   | 77    | -     |
| Y554         | Sidechain              | A29          | Backbone               | Hydrophobic      | -                   | -     | 76    |
| F577         | Backbone               | G30          | Backbone               | Hydrogen bond    | -                   | 12    | -     |

Interactions lasting over more than 10% of MD simulations frames of A10 variants/Her2 complex are reported. Interactions lasting for more than 50% of the simulation frames are highlighted in yellow.
